# Supplementary material for: The Histone Deacetylases HosA and HdaA Affect the Phenotype and Transcriptomic and Metabolic Profiles of Aspergillus niger
Source: PubMed Central journal article supplement (PMC6784283; doi:10.3390/toxins11090520), 2019-09-07
Supplement: toxins-11-00520-s001.pdf [file toxins-11-00520-s001.pdf]

# Supplementary Materials: The Histone Deacetylases HosA and HdaA Affect the Phenotype and Transcriptomic and Metabolic Profiles of *Aspergillus niger*

Xuejie Li, Lijie Pan, Bin Wang and Li Pan

>A\_niger\_CBS\_513\_88 An07g08380

MARSAIVQEYAPPSSAPTFVDRKVOTHERQQNGISRPNGYRVSWHANPAVEPHHFGQSHPMKPWRLTLTKQLVMA  
YGMHHAMDLYLARAATYEELADFHKSDYLDLFLQQVVPGD MENPEQSENIARFNFGDDCPIFDGLYNYCSLYAGGT  
IDAARKLCNNQSEIAVNWSSGGLHHAKEASGFCYINDIVLILQLRLHPRVMIYDIDVHHGDGVEQAFWSTDR  
VLTVSFHKYDKDNFFPGTGGLDSTGPTHPLNPGAHHSVNPLHDGIDDESIIQLFRDVGSCVEVYRPGAIVLQCG  
ADSLGCDRLGCFNLNVA AHGACVAVFKTFNLPLL VVGGGGYT PRNVSRWAHETSILIDAQDTIDPHIPETVTFRN  
HFGPDFSLFPPLSEMRKLENKNPRTYLAGLLQSIREQLRYIQGAPSVQMSFIPPDILGLREDTEKEIEEETAMMEEERE  
RSGGSLGKSSRRRDLERGAGQRGELF \*

>A\_niger\_CBS\_513\_88 An07g07850

MSNSLAPLDPITNGPADRNKKVAYFYDSVGNAYVSGHPMKPHRIRMAHSLVMNYGLYKKMEIYRAKPASKYE  
MTQFHTDEYIDFLSKVTPDNMDSFAKEQSKYVVGDDCPVFDGLFEFCGISAGGSMEGAARLNRNKCDIAVNWAGG  
LHHAKKSEASGFCYVNDIVL GILELLRFKQRVLYVDIDVHHGDGVEEAFYTTDRVMTVSFHKYGEYFPGTGELRDIG  
VGQGHYAVNFPLRDGIDDVSYKSIFEPVIKSVMEWYRPEAVVLQCGGDSLSGDRLGCFNL SMRGHANCVNFVKSF  
NLPTMILGGGGYTMRNVARTWAFETGILVGDTLGAELPYNDYEFYFAPDYELDV RPSNMDNANTKEYLDKIRTQV  
VENLKRTAFAPSVQMTEVPREPLVEGMDDEADAILDDLDEDENKDKRFTKRRFDQYIEKPGELSDSDEELAGANG  
VRRQPNALKRRNQVNYRNLDVNDSGLESGMATPQDASSLPDDMDTTADAKMTEAPEPETEAQATPSAADAPSR  
ADEASAAEQTEMAVDGPETTAASAPISRQPSPKPQDEDTMVDAGEVAPETEKSEAAPEGAEEEEEEKKPSEETPA  
ADKPATEETPA TKDESPAKETTEAADTAEAE TKPAEASEPSETKDKTPEAAKDESGEAKSKEPSAEAA GATEAEKTE  
EASKTEE \*

>A\_niger\_CBS\_513\_88 An16g01840

MAMDEDEDTVMGEAGSHHPTSVSSHQWPSNPGSSQAGQLNGSSDPSIAPPLLGPTMKLPLSVHSGDPRPENTAS  
AEDQGVSPKSLPKSDSGDATTEDFDKQDSLVEDNSDWTDEDTVARTGLPIASLPSGLCYDVMRYHCEVRPTADV  
HPEDPRRIYYIKELCRAGLVDDPESCRPLVSRPLKRINARNATEAEISLIHTPDHFAFVESTKDMSDDELIALEHTRDS  
IYFNKLTFASSILVSGAIETCLAVATRKVKNAIAVIRPPGHHAEHDKTMGFCLFNNVSVAAARVCQNRLGDSCKILI  
LDWMGNSTLEGGKVTGITVVKALVSEADVFISNQCEPVASGFDAAGDELGGCFVTPSCYAHMTHMLMTLANGK  
VAVCLEGGYNFRSISKSALAVTKTLMGDPDRLHTTSPSALATTTVRRVMMIQSHYWHCMYPKGPQDGLFTDRLH  
DVIRAYQSKQLYDNYKLTSLFIYRTAISRSFENQVLASSNYHQTVPLVVFHDPPEIMGLPHPVNTKLEAHNCWLAD  
VMKDYIGWIVSKGYAVIDVNI PKHV TIDPSSGKYEEEDENRPTATEELAGYLWDNYIEPSEATEIFFMGVGNAFYGV  
ANLLINRETLYKRVNSVVSFAENPVRAIASHTQVWLSRWYKDNSLVFVSHTHGVWNNVETRRKPSKRYGQLVQS  
PKASLSEMLMHHKEEVYQWISERADVQDSEETEDEKKPKSKSRSPTKENQTEPRSVPG \*

>A\_niger\_CBS\_513\_88 An14g00560

MDPSKRHEPTSFTAASSTPATGPPLSTDDATSSTHRSLHPSLHAMSLPPSSPGLSSAALLSPSPDPPARAVATQAHTPR  
RIPSSSLAEERRKSSPSLKKRSSTASLRNARGASTSPRPSLSRHSSSSFGTSPTSASATHPNMAKKAHRTVSAEHPVTTA  
ASIAAESFRKEVDWHQSAKLQSQTLVLVHDACYGHRFSRPRTSRAALNSIVERPERIQASVLGISAAYVRLARRHAG  
GAFAPHPDLNPQQLPVPPHIRKTARTLSLSSPAVTHVHGSKW MEDLKTMCDAAESRLALNGKELVRPRSAGKDS  
AATNAPAFHEGDLYLCSLSA FEGALGGVSEGVD AVMGPAPT KRAFVCIRPPGHHCSAGHPSGFCWINNVHVGIS  
YAAMTHGLTHAAILD FDLHHDGSDIAWQQNHRAVTAPRNAAHRKTMVGYFSLHDINSYPCEMGEPEKVRN  
ASVCIDKAHGQSIWNVHLEPWKSDKEFWDL YAAKYTVLIDKARAF LRMHTERLANTPNGPPP KAAIFISAGFDASE  
WEGAGMQRHQVNVPTEFYARFTADVVRMANEEGLTDGRIISVLEGGYSNRALTSVICTGLGDAKGSTHDVDEQQ  
INRLASEMTDRLGLSNAEGRSVTEPVYNSEWWSPGVLEELEALVYSPAAPVKPREKAAPTYLT TTTQSFSAKVNNPPR  
DRRSTGSHSSPEPEAPSPPPVSWATA THELCKVLIPTGRQTTSCQPEELNAEASRLRRERQTA VDAASTSATTAAVA  
AAAAAATATATAAEDSRMKL RVRKPKPSLPLSPAETVKRPAARGSRRTTIDTAPDTAPAVQTPARVTRRKSAGA  
GSAASTPEPTGPRPATSATVRKTNTS QSSTPRLPSSPNTPPVPRVPPAFLSAEESPNPDGPQDDLDLSTAGVRKLIHK  
LKVPSP EENAARERERERRIAERKRTASKATSKTQTQTQTPKSPRKPAGRAQTSSASKTASRSAAKPAPVAIHPGTE  
AKDEPSIVTPTSSPPSVGKIESNTTNGWDRGESEAAAGMVMSPPLTPGRPPSALYSPPGMTLARDGLPVMSSGVIP

FADTVRGMQEEEEQKGVNATHISEQSPTRSDKVVHRHAESFASPHDSRRRALPASARSIINDLSNLRITPSYNLTLSF  
PSPNSHSQSTIISRIPKCPQYPPPPPTKHHHQQQQQTPTSTPSARTARSQPATNSTSSRSAAPPARGHSVSSTAPKQ  
RISAQTHVSRHHHPPPPPHLQPSKNNPSTPQINAHSTSHAKRSSIHSPTPACGAISAGRSIVSNIG \*

>A\_niger\_CBS\_513\_88 An11g06980  
MAPPAIPAADLSSFTTYLKGCRRVIALLGAGISASSGLPTFRGAGGLWRSYDATDLATPEAFDANPDLVWQFYSYRR  
HMALKAQPNRAHYALAEARKNKDFITLSQNVDDRTGEEASRSIASALGNNEDEADVSDERVPLSAVPYEELPHCP  
ECKDGLLRPGVWVWFGESLPSHTIDYVDEWLNKGKVDLILVVGTSRVPYPAAGYVDKARSKGARVAVVNMDRNDV  
GSSGLKPGDWFFEGDAGTIVPEILKGVIGDI \*

>A\_niger\_CBS\_513\_88 An08g02500  
MAPRRTATTSSTTTTTTTTTSTHSTTSSRSPKSLASLGMDDSDCSSLSSAPASPLAPPGFYSPPPSQDADEPSA  
ARSQDDLPPARKRRVAAPKERRTQHLDSLATAGLSYTEQQSQIDYLVKTLQRHRKIVVIAGAGISTSAGIPDFRST  
GLFKSLQKKHNLKASGKLLFDAAVYQDEALTASFQDMVRSLSSEAAKTSPTAFHHMLARLGQENRLTRYLTONID  
GIETSMPLATQIPLNVKAPWPRTIQLHGSLDKMVCQKCRHLSDFDAGLFRPDAPCEPECCRNQFRMETGQRSH  
GIGKMRPRIVLYNEHNPDEEAITSVMNADIRSRPDALIVVGTSLKIPGVRRLVKSLCSVIRSRNRNGVTMWINNEYPTG  
KEFEDCWDLMVKGDCERSCTTGQPQTVGCAGRQGEVSVVVTSPKKRPTPTGFLTPSSSYEDESPLAKKGRPNPAS  
NGRSITDVLQAAKTDGPKKAAPKKAAPKKAAPKGRSKKVEPAKNSKINNFGRVTKAQKAAATSDKSTKLDKDDTK  
AMHPLAPGAARNNGPNQTFPKLVGKGASTPPPSGRWRQNETISPD SIPRGMNLLLNEPTA \*

>A\_niger\_CBS\_513\_88 An01g07390  
MDLVSAPSGEDSSLKDPVVQVEAVDMASAVSKAGTATENTAAAKEEVTQSEYETDSDGSGDEWETQSLYEDAIQVL  
RDDQLRDGVDPDACTLEEAVAYRKRRLHEVGKAAFVEETLGQDKVTARKLCTAFGILPPAFLADAPDEAFHLLAIAIS  
REFSRRPKLPQYNTIDDAVKLLKESKNIVLTGAGISTSLGIPDFRSKDTGLYSQLAHLGLSDPQEVFDIQVFREDPSIFF  
SIAKDILPTEKKFSPTAFIRVLQDKGKLLTNYTQNIIDNIEANAGVLPENIVQCHGSFATATCVKCYKVKGDEIFDEI  
KKGVIQCDSCRKRIAEDSGIKRKRSSNGVHKNRKNDNGDSTDDDYEIPTPGVMKPDITFFGEDLPDEFGRLLHHD  
RDQVDLVIVIGTSLKVAPVAEVPGLVPRTPQLYISRTPVSHTEFDIDLLGDCDVVVSELRRAGWELKHEMIPPEDEKV  
EVLPEVSVGHLVGRHSMYEGWLMGA \*

>A\_niger\_CBS\_513\_88 An09g05710  
MSRKRKASSTIYTSHGSHKRKRWRVYQHVHSSDTETDNDSEALGADEWLINCILDESESYQLIDWEGPWTPTWEP  
KENANDVAVQVWEDKRRRDQVQEEFVRCNTPLPLPPTPPGSSVQERCRDSLGNPNSQPQTEAPTDEPPRQSPSTSP  
PFVLPSTEPEPSLCLDDDARGILRSSVNEVPSPHPQSDIDNLLNPEVLPTARATEVPAIFSTPREPRVSDEVEETPTTP  
CRAGNTGTPNVAEGIPETPHNESSAAPANIPPELLPANPAEGADEIPETPPGLVDEPQLFRRASTVPESIAVNSTHTPA  
ARISPAPFRSLVDQLISSISRPSMDTQEKEGPSLSETMEKYSQFEGSTPREKLRNAYAQLRAKANPGPESSATPSSAGDI  
EPSAPVSIPETTAPLSVRVDKEPTHPKDNEANQDTTIPVEPEEIGPPQTIQPSALSMHFAEEPTPGSVHLGPSEFAVPL  
PMDSRVKDDYERVLTSESQSIRDFLGVTSQPDTTEYQRDSSLPKMHDILDRLSNISTHPDLNIAEHINSESDLGREAA  
WAEYSSAKFLLLSYLLETASMRDIHLVIMVQGEKTQRVVERYLMGKGLLYTRPRQEMSGTNIIEVSMVKDSLSFGIQ  
TTRNDGVMETYKPPAAIALDKSFSSKTPTVEHMRTTFARNGNLLPVVRLVSNSSSEHIELCFPLSEPERLRTVLQYSI  
RLRDVVGDLQDDALGVQEDAEEILLSCLVSDNFNAHWSLPHIEPLHILSPEQLESSQELQSRPGVDIQLTNPQAQKR  
AFAEDEVEQSARMKTEEPTQEPTQSTESTGFPSQPLNGGLQTLNHLVQMQNSHAAELEKQKALAGAARLQE  
RENVLEKLQHRYETRTKDFHKLRRHDRLTQAKTSDQRVEKQKEELMKLKDERTQLRHELEEARASLKAGGSA  
AELESAREDIRRLTKDNASLERKAEYEAQAEYTREYQYQASTVAAQSGNELRQLRSENETLKRKVEGDATHLRELN  
AKNDEARHLARVLELEATLTSREDLLRRKEELREIRKNRPSTRSTSTQPRSPKWTAGNSRPTSPGINNGSSLAGRGA  
LRFSEMPL \*

**Figure S1.** Amino acid sequences of eight HDACs in *A. niger* FGSC A1279 obtained from ASPGD. \* represents termination codon.

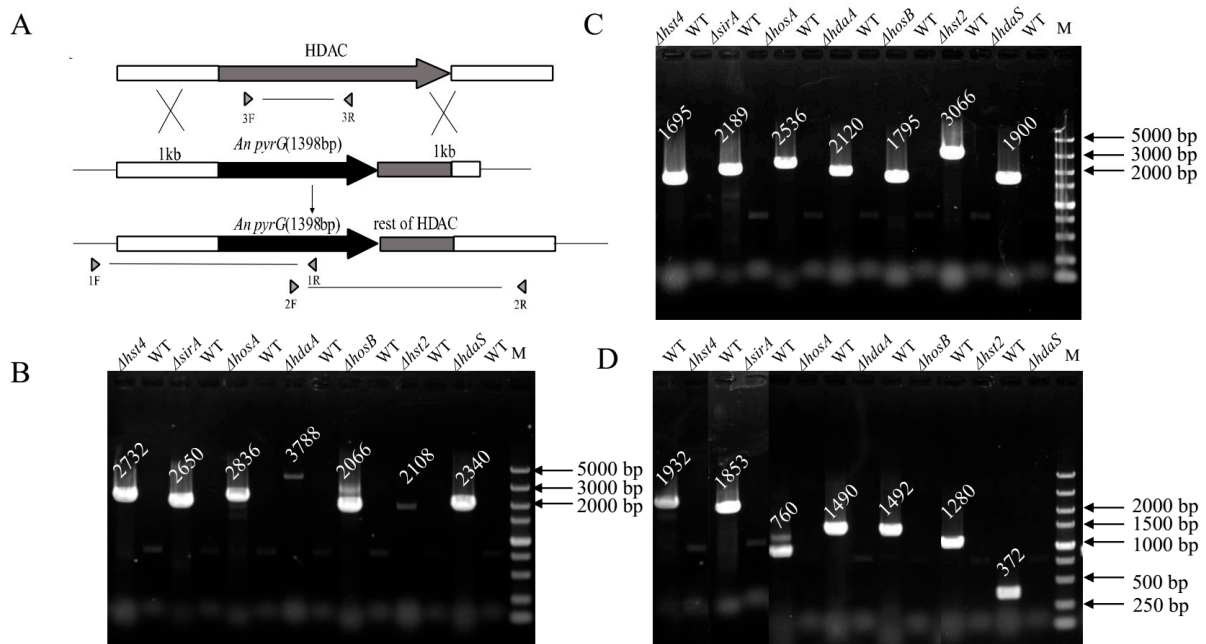

**Figure S2.** Disruption of HDAC genes in *A. niger* FGSC A1279. (A) Each HDAC coding sequence was replaced with the *pyrG* selection marker by double homologous recombination. Positive deletion strains were confirmed by PCR screening with three different primer pairs. Small triangles indicate the positions of the PCR primers that were used to identify the HDAC disruption strain. Straight lines indicate the amplicon lengths for PCRs using the corresponding primers. (B, C, D) Agarose gel electrophoresis of the PCR products using primers 1F and 1R, 2F and 2R, and 3F and 3R respectively, which was used to confirm that the histone deacetylases disruption mutant is homokaryotic. The template of each PCR was marked on each lane. Lane M, DL5000 DNA Marker (TaKaRa).

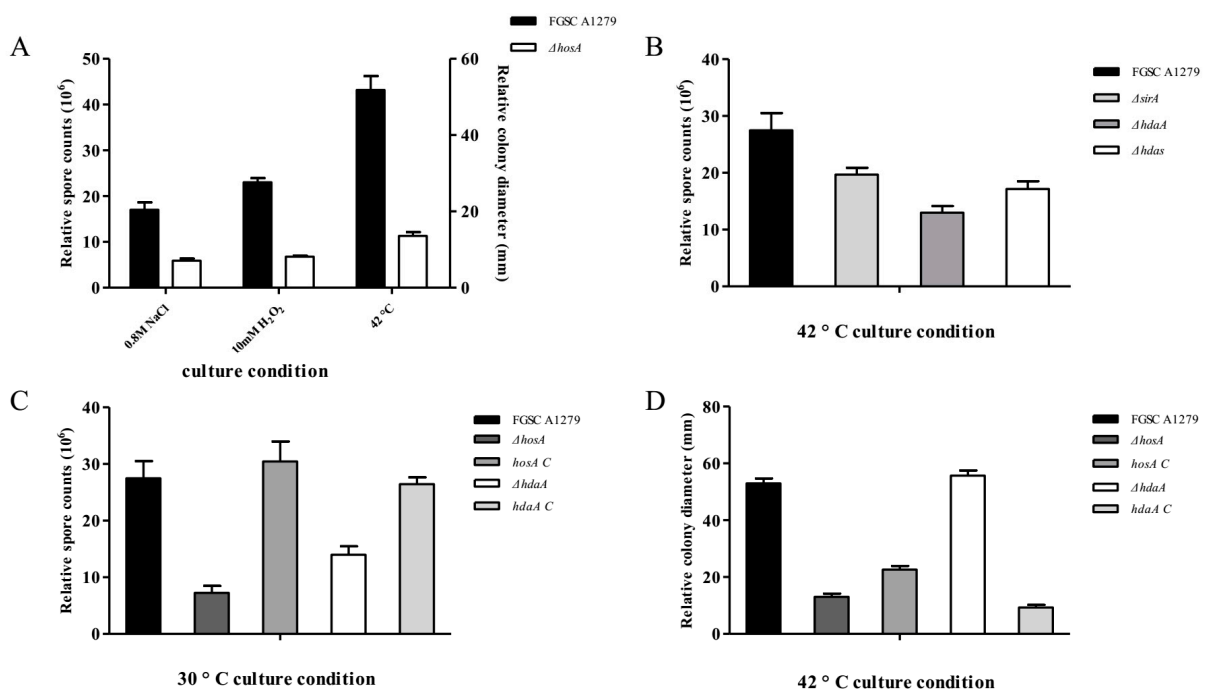

**Figure S3.** Statistical analysis of spore count and colony diameter. (A) Quantification of rate of conidiation under condition of 0.8M NaCl or 10mM H<sub>2</sub>O<sub>2</sub> and colony diameter at 42 °C of FGSC A1279 and  $\Delta$ *hosA* strains. (B) Graphs represent the number of conidia at 42 °C. (C) Graphs represent the number of conidia at 30 °C. *hosA* C: *hosA* complementation strain, *hdaA* C: *hdaA* complementation strain. (D) Graphs represent radial growth at 42 °C. All data are represented as means  $\pm$  s.d. ( $n = 3$ ).

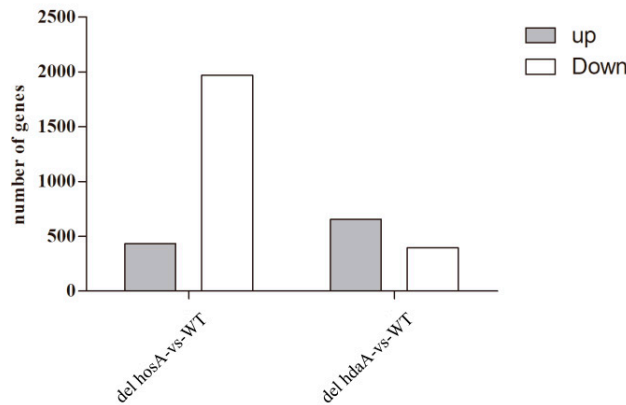

**Figure S4.** Overview of the number of differentially expressed genes via pairwise comparisons of the  $\Delta$ *hosA* mutant and wild strains,  $\Delta$ *hdaA* mutant and wild strains.

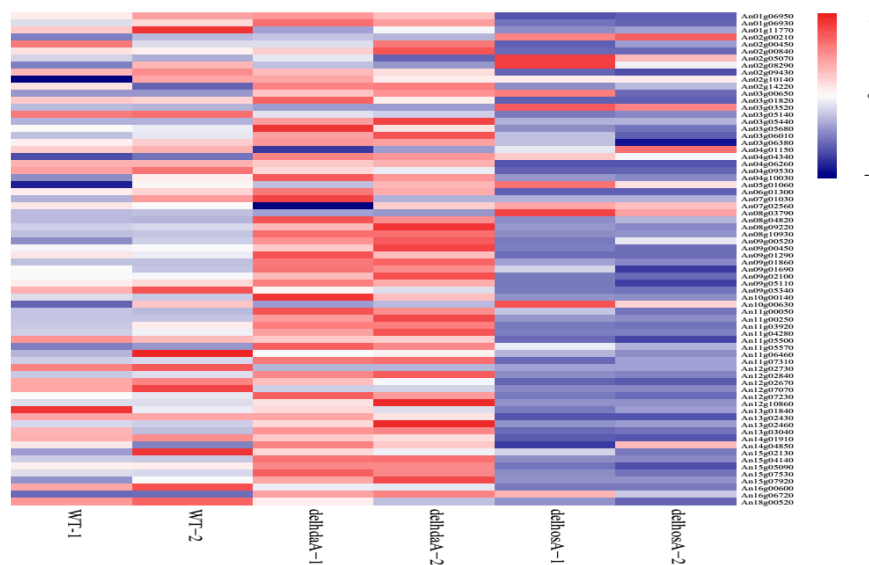

**Figure S5.** Heatmaps display expression of backbone genes of SMs biosynthesis gene clusters in wild strains,  $\Delta$ *hosA* and  $\Delta$ *hdaA* mutants after seven days of growth on WATM at 30°C.

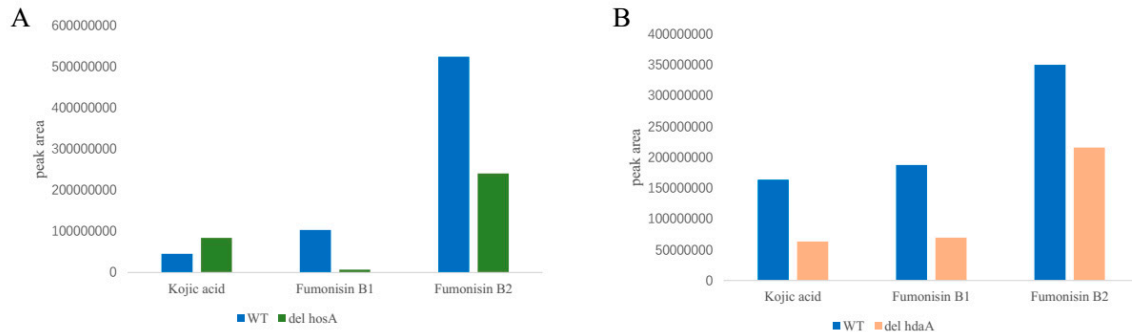

**Figure S6.** Analysis of the expression levels of kojic acid (KA), fumonisin B1 and fumonisin B2 in the wild-type strains and the  $\Delta hosA$  and  $\Delta hdaA$  mutants. (A) Bar graphs show the expression values (peak area) for KA, fumonisin B1 and fumonisin B2 in the wild-type strains and  $\Delta hosA$  mutants after seven days of growth in WATM at 30 °C. (B) Bar graphs show the expression values (peak area) for KA, fumonisin B1 and fumonisin B2 in wild-type strains and  $\Delta hdaA$  mutants after seven days of growth in WATM at 30 °C ( $n = 1$ ).

**Table S1.** Summary of sequencing and reads mapping.

| Samples          | Total Clean Reads (M) | Total Mapping (%) | Uniquely Mapping (%) |
|------------------|-----------------------|-------------------|----------------------|
| WT-1             | 23.1                  | 91.22             | 88.19                |
| WT-2             | 23.09                 | 91.18             | 88.14                |
| $\Delta hdaA$ -1 | 22.91                 | 90.81             | 87.65                |
| $\Delta hdaA$ -2 | 22.99                 | 90.82             | 87.72                |
| $\Delta hosA$ -1 | 23.06                 | 91.56             | 88.5                 |
| $\Delta hosA$ -2 | 23.1                  | 91.56             | 88.5                 |

**Table S2.** Expression level of genes related to asexual or sexual reproduction.

| Proteins          | Genes ID   | FPKM   |        |            |            |            |            |
|-------------------|------------|--------|--------|------------|------------|------------|------------|
|                   |            | WT-1   | WT-2   | del hosA-1 | del hosA-2 | del hdaA-1 | del hdaA-2 |
| <i>brlA</i>       | An01g10540 | 19.05  | 23.36  | 0.3        | 0.45       | 6.43       | 4.76       |
| <i>abaA /tec1</i> | An01g03750 | 4.77   | 4.59   | 2.19       | 2.12       | 4.15       | 4.35       |
| <i>dewA</i>       | An03g02400 | 462.53 | 560.82 | 1.04       | 0.69       | 48.54      | 28.14      |
| <i>yA</i>         | An01g13660 | 149.54 | 172.28 | 0.07       | 0.35       | 99.89      | 77.81      |
| <i>wA</i>         | An12g02050 | 0.03   | 0.07   | 0.02       | 0.02       | 0.29       | 0.24       |
| <i>ppoC</i>       | An02g07930 | 31.76  | 38.29  | 4.21       | 3.29       | 22.78      | 25.29      |
| <i>ppoD</i>       | An12g01320 | 49.96  | 57.96  | 2.57       | 1.48       | 30.87      | 32.78      |
| <i>nsdD</i>       | An02g09610 | 76.97  | 76.28  | 24.49      | 34.82      | 54.69      | 65.15      |
| <i>Nc asd-1</i>   | An14g01130 | 1.27   | 0.95   | 0.32       | 0.39       | 0.72       | 1.04       |

**Table S3.** Expression level of genes related to cell wall biosynthesis.

| Proteins    | Genes ID   | FPKM   |        |           |           |           |           |
|-------------|------------|--------|--------|-----------|-----------|-----------|-----------|
|             |            | WT-1   | WT-2   | delhdaA-1 | delhdaA-2 | delhosA-1 | delhosA-2 |
| <i>GelB</i> | An08g07350 | 134.64 | 140.92 | 89.91     | 92.14     | 64.81     | 66.14     |
| <i>BgtA</i> | An08g03580 | 260.41 | 261.51 | 145.87    | 110.56    | 4.72      | 4.54      |
| <i>CrhD</i> | An01g11010 | 398.43 | 295.43 | 410.83    | 518.3     | 167.63    | 161.94    |
| <i>ExgA</i> | An18g04100 | 18.86  | 23.11  | 8.37      | 6.98      | 1.28      | 1.93      |
| <i>BxgA</i> | An01g12450 | 115.61 | 123.43 | 105.44    | 125.79    | 56.47     | 51.41     |
| <i>BgxB</i> | An02g13180 | 24.64  | 29.61  | 14.46     | 11.64     | 15.42     | 11.96     |
| <i>AgsD</i> | An02g03260 | 27.16  | 38.63  | 24.32     | 20.83     | 0.09      | 0.09      |
| <i>AgsC</i> | An12g02450 | 9.05   | 11.64  | 12.91     | 16.77     | 5.13      | 2.9       |
| <i>AgsB</i> | An15g07810 | 17.71  | 23.79  | 28.91     | 28.54     | 4.97      | 3.49      |
| <i>agtB</i> | An12g02460 | 76.01  | 84.82  | 125.27    | 131.69    | 25.47     | 16.67     |
| <i>agtC</i> | An15g07800 | 33.98  | 36.05  | 45.49     | 42.92     | 11.45     | 10.1      |
| <i>AgnE</i> | An15g04760 | 124.53 | 129.22 | 140.66    | 103.68    | 0         | 0.08      |
| <i>ChsG</i> | An08g05290 | 7.77   | 11.08  | 6.65      | 6.3       | 3.57      | 3.07      |
| <i>CtcA</i> | An09g06400 | 47.45  | 20.77  | 7.15      | 8.77      | 20.82     | 33.79     |
| <i>CtcB</i> | An09g05920 | 14.91  | 15.09  | 7.03      | 4.95      | 4.05      | 3.9       |
| <i>CfcI</i> | An02g13580 | 13.31  | 14.24  | 3.57      | 3.87      | 0.59      | 0.38      |
| <i>KslA</i> | An02g03980 | 18.47  | 19.93  | 11.56     | 13.87     | 7.39      | 8.91      |
| <i>DfgA</i> | An18g01410 | 0.56   | 1.36   | 0.14      | 0         | 0.05      | 0         |
| <i>DfgB</i> | An03g00740 | 5.7    | 6.26   | 3.67      | 3.34      | 1.61      | 1.51      |
| <i>DfgF</i> | An06g00360 | 17.31  | 20.06  | 33.04     | 35.47     | 5.48      | 8.21      |
| <i>hypB</i> | An01g10940 | 28.65  | 30.76  | 1.87      | 0.94      | 2.33      | 3.01      |
| <i>hypC</i> | An03g02360 | 350.38 | 417.19 | 44.61     | 20.6      | 0         | 0         |
| <i>hypD</i> | An03g02400 | 462.53 | 560.82 | 48.54     | 28.14     | 1.04      | 0.69      |
| <i>hypF</i> | An07g03340 | 195.05 | 199.11 | 47.8      | 44.43     | 31.46     | 32.18     |
| <i>hypH</i> | An09g05530 | 4.99   | 6.72   | 2.07      | 1.43      | 0.54      | 1.19      |

**Table S4.** Expression level of backbone genes in SMs gene clusters.

| Backbone Genes | Cluster Type    | FPKM   |        |            |            |           |           |
|----------------|-----------------|--------|--------|------------|------------|-----------|-----------|
|                |                 | WT-1   | WT-2   | del hosA-1 | del hosA-2 | delhdaA-1 | delhdaA-2 |
| An01g06950     | PKS             | 0.27   | 0.37   | 0.07       | 0.08       | 0.38      | 0.33      |
| An01g06930     | PKS             | 400.35 | 548.66 | 198.70     | 160.55     | 794.12    | 693.34    |
| An01g11770     | NRPS-Like       | 0.17   | 0.34   | 0.00       | 0.02       | 0.02      | 0.10      |
| An02g00210     | NRPS-Like       | 116.97 | 132.17 | 189.52     | 199.39     | 134.87    | 130.26    |
| An02g00450     | PKS             | 0.05   | 0.02   | 0.00       | 0.01       | 0.02      | 0.05      |
| An02g00840     | NRPS-Like       | 52.83  | 47.80  | 1.96       | 1.95       | 58.78     | 99.72     |
| An02g05070     | NRPS            | 0.61   | 0.54   | 1.07       | 0.83       | 0.65      | 0.42      |
| An02g08290     | PKS-NRPS hybrid | 10.13  | 16.27  | 20.13      | 13.36      | 11.93     | 10.77     |
| An02g09430     | PKS             | 3.49   | 4.02   | 0.85       | 0.62       | 3.45      | 2.97      |
| An02g10140     | NRPS-Like       | 0.00   | 0.09   | 0.07       | 0.07       | 0.09      | 0.07      |
| An02g14220     | PKS-Like        | 10.52  | 8.59   | 9.05       | 9.47       | 11.71     | 11.81     |
| An03g00650     | NRPS            | 49.36  | 49.53  | 77.29      | 44.10      | 68.42     | 74.17     |
| An03g01820     | PKS             | 2.41   | 2.30   | 0.00       | 0.00       | 3.69      | 1.98      |
| An03g03520     | NRPS            | 52.12  | 51.23  | 85.31      | 78.90      | 48.85     | 49.01     |
| An03g05140     | PKS             | 2.46   | 2.53   | 0.43       | 0.55       | 1.17      | 1.01      |
| An03g05440     | PKS             | 0.00   | 0.00   | 0.00       | 0.00       | 0.04      | 0.06      |

|            |                 |       |       |       |       |       |       |
|------------|-----------------|-------|-------|-------|-------|-------|-------|
| An03g05680 | NRPS-Like       | 0.25  | 0.23  | 0.06  | 0.02  | 0.67  | 0.32  |
| An03g06010 | NRPS            | 0.02  | 0.03  | 0.02  | 0.00  | 0.06  | 0.08  |
| An03g06380 | PKS             | 15.55 | 16.65 | 13.54 | 9.22  | 18.36 | 18.07 |
| An04g01150 | NRPS-Like       | 0.43  | 0.47  | 0.35  | 0.55  | 0.17  | 0.27  |
| An04g04340 | PKS             | 2.67  | 3.06  | 5.03  | 4.32  | 5.82  | 5.61  |
| An04g06260 | NRPS            | 0.09  | 0.09  | 0.01  | 0.01  | 0.08  | 0.09  |
| An04g09530 | PKS             | 1.44  | 1.72  | 0.00  | 0.00  | 1.08  | 0.74  |
| An04g10030 | PKS             | 0.40  | 0.75  | 0.43  | 0.38  | 1.23  | 1.05  |
| An05g01060 | NRPS            | 1.02  | 1.99  | 2.65  | 2.09  | 1.67  | 2.31  |
| An06g01300 | NRPS            | 22.07 | 24.49 | 7.82  | 7.72  | 33.20 | 28.26 |
| An07g01030 | PKS             | 0.00  | 0.02  | 0.00  | 0.00  | 0.03  | 0.00  |
| An07g02560 | DMAT *          | 2.87  | 2.72  | 3.27  | 3.14  | 1.29  | 3.00  |
| An08g03790 | PKS             | 10.38 | 11.32 | 44.38 | 31.74 | 8.16  | 7.34  |
| An08g04820 | NRPS-Like       | 0.62  | 0.60  | 0.51  | 0.60  | 1.29  | 1.12  |
| An08g09220 | NRPS-Like       | 3.25  | 3.50  | 1.83  | 1.41  | 6.74  | 10.78 |
| An08g10930 | PKS-Like        | 0.88  | 0.93  | 0.22  | 0.31  | 4.09  | 4.12  |
| An09g00520 | NRPS            | 0.05  | 0.08  | 0.04  | 0.09  | 0.16  | 0.19  |
| An09g00450 | NRPS-Like       | 7.17  | 7.52  | 3.28  | 2.75  | 9.62  | 14.54 |
| An09g01290 | PKS             | 0.07  | 0.05  | 0.00  | 0.00  | 0.14  | 0.09  |
| An09g01860 | PKS             | 0.02  | 0.02  | 0.01  | 0.00  | 0.11  | 0.12  |
| An09g01690 | NRPS            | 1.29  | 1.13  | 1.17  | 0.75  | 1.74  | 1.66  |
| An09g02100 | PKS-Like        | 0.15  | 0.14  | 0.06  | 0.05  | 0.20  | 0.28  |
| An09g05110 | NRPS-Like       | 1.21  | 1.28  | 0.69  | 0.50  | 1.63  | 1.44  |
| An09g05340 | PKS             | 0.74  | 1.08  | 0.04  | 0.03  | 0.48  | 0.35  |
| An10g00140 | PKS             | 3.14  | 2.26  | 0.02  | 0.00  | 14.01 | 7.55  |
| An10g00630 | PKS-Like        | 0.56  | 1.14  | 1.47  | 1.08  | 0.71  | 0.77  |
| An11g00050 | NRPS            | 0.13  | 0.12  | 0.13  | 0.07  | 0.32  | 0.27  |
| An11g00250 | PKS-NRPS hybrid | 0.62  | 0.62  | 0.30  | 0.22  | 1.99  | 2.68  |
| An11g03920 | PKS             | 0.11  | 0.20  | 0.02  | 0.01  | 0.37  | 0.37  |
| An11g04280 | PKS             | 0.34  | 0.45  | 0.14  | 0.14  | 0.78  | 1.02  |
| An11g05500 | NRPS-Like       | 5.87  | 5.47  | 3.54  | 3.23  | 5.33  | 5.25  |
| An11g05570 | PKS             | 0.92  | 0.97  | 1.13  | 1.01  | 1.51  | 1.42  |
| An11g06460 | PKS-NRPS hybrid | 0.50  | 1.72  | 0.50  | 0.38  | 0.80  | 0.83  |
| An11g07310 | PKS             | 0.08  | 0.09  | 0.01  | 0.05  | 0.23  | 0.24  |
| An12g02730 | PKS             | 2.21  | 2.68  | 0.00  | 0.00  | 0.13  | 0.14  |
| An12g02840 | NRPS            | 1.01  | 1.22  | 0.35  | 0.23  | 3.14  | 3.73  |
| An12g02670 | PKS             | 0.75  | 0.87  | 0.04  | 0.01  | 0.68  | 0.45  |
| An12g07070 | PKS             | 1.32  | 1.99  | 0.00  | 0.00  | 0.41  | 0.44  |
| An12g07230 | NRPS            | 1.94  | 1.72  | 0.64  | 0.53  | 3.70  | 3.09  |
| An12g10860 | NRPS-Like       | 0.02  | 0.02  | 0.00  | 0.00  | 0.04  | 0.10  |
| An13g01840 | DMAT *          | 5.88  | 2.37  | 0.78  | 1.31  | 3.25  | 2.17  |
| An13g02430 | PKS             | 6.03  | 5.97  | 0.55  | 0.54  | 5.96  | 4.63  |
| An13g02460 | NRPS-Like       | 0.12  | 0.10  | 0.00  | 0.02  | 0.28  | 0.67  |
| An13g03040 | NRPS            | 1.78  | 0.69  | 0.09  | 0.19  | 2.07  | 2.16  |
| An14g01910 | PKS             | 9.74  | 11.28 | 0.47  | 0.30  | 8.83  | 7.77  |
| An14g04850 | PKS             | 1.99  | 1.78  | 1.68  | 2.06  | 2.15  | 2.04  |
| An15g02130 | PKS             | 4.25  | 11.40 | 5.38  | 3.45  | 7.26  | 6.02  |
| An15g04140 | PKS             | 13.62 | 13.10 | 5.98  | 5.05  | 40.11 | 40.73 |
| An15g05090 | PKS             | 1.60  | 1.64  | 0.45  | 0.18  | 2.51  | 2.53  |

|            |                 |       |       |      |      |       |       |
|------------|-----------------|-------|-------|------|------|-------|-------|
| An15g07530 | NRPS            | 1.25  | 1.22  | 0.91 | 0.79 | 2.21  | 2.02  |
| An15g07920 | PKS             | 0.02  | 0.03  | 0.02 | 0.02 | 0.04  | 0.05  |
| An16g00600 | NRPS-Like       | 33.66 | 47.51 | 2.82 | 2.64 | 17.76 | 16.72 |
| An16g06720 | NRPS            | 0.59  | 0.60  | 4.94 | 2.33 | 5.46  | 6.21  |
| An18g00520 | PKS-NRPS hybrid | 0.19  | 0.23  | 0.03 | 0.00 | 0.12  | 0.06  |

\*: Dimethylallyl tryptophan synthase.

**Table S5.** Data of metabolomic studies. Expression of kojic acid, fumonisin B1 and fumonisin B2 in wild strains and  $\Delta hosA$  mutant.

| Names        | Formula       | Molecular Weight | RT [min] | Pos WT      | Pos del hosA |
|--------------|---------------|------------------|----------|-------------|--------------|
| Kojic acid   | C6 H6 O4      | 142.02646        | 4.411    | 45124755.87 | 83986818.87  |
| Fumonisin B1 | C34 H59 N O15 | 721.38558        | 11.678   | 103269356.1 | 6773931.209  |
| Fumonisin B2 | C34 H59 N O14 | 705.39025        | 11.819   | 524825567.1 | 240944030.1  |

**Table S6.** Data of LC-MS. Relative output of kojic acid, fumonisin B1 and fumonisin B2 in  $\Delta hosA$  mutant/WT and *hosA C*/WT.

| Name         | Formula       | Molecular Weight | RT [min] | Ratio: ( $\Delta hosA$ )/(WT) | Ratio: ( <i>hosA C</i> )/(WT) |
|--------------|---------------|------------------|----------|-------------------------------|-------------------------------|
| Fumonisin B1 | C34 H59 N O15 | 721.38687        | 12.23    | 0.01                          | 0.583                         |
| Fumonisin B2 | C34 H59 N O14 | 705.39218        | 12.343   | 0.032                         | 0.685                         |
| Kojic acid   | C6 H6 O4      | 142.02677        | 4.996    | 1.951                         | 1.287                         |

**Table S7.** Data of metabolomic studies. Expression of kojic acid, fumonisin B1 and fumonisin B2 in wild strains and  $\Delta hdaA$  mutant.

| Names        | Formula       | Molecular Weight | RT [min] | pos_WT      | pos_del_hdaA |
|--------------|---------------|------------------|----------|-------------|--------------|
| Kojic acid   | C6 H6 O4      | 142.02664        | 5.033    | 163530429.9 | 63109327.37  |
| Fumonisin B1 | C34 H59 N O15 | 721.38623        | 11.71    | 187371433.7 | 69481438.94  |
| Fumonisin B2 | C34 H59 N O14 | 705.39122        | 11.776   | 349702627.4 | 215526568.1  |

**Table S8.** Data of LC-MS. Expression of kojic acid, fumonisin B1 and fumonisin B2 in  $\Delta hdaA$  mutant/WT and *hdaA C*/WT.

| Name         | Formula       | Molecular Weight | RT [min] | Ratio: ( $\Delta hdaA$ )/(WT) | Ratio: ( <i>hdaA C</i> )/(WT) |
|--------------|---------------|------------------|----------|-------------------------------|-------------------------------|
| Fumonisin B1 | C34 H59 N O15 | 721.38686        | 12.248   | 0.146                         | 0.257                         |
| Fumonisin B2 | C34 H59 N O14 | 705.39218        | 12.371   | 0.22                          | 0.41                          |
| Kojic acid   | C6 H6 O4      | 142.02675        | 4.977    | 1.15                          | 1.677                         |
